# Supplementary material for: Radical-induced, proton-transfer-driven fragmentations in [b5 − H]˙+ ions derived from pentaalanyl tryptophan
Source: Royal Society of Chemistry journal article supplement (doi:10.1039/c5cp00178a), 2015-01-01

## **Radical-Induced, Proton-Transfer-Driven Fragmentations in $[b_5 - H]^{\bullet+}$ Ions Derived from Pentaalanyl Tryptophan**

*Declan Williams,<sup>a</sup> Justin Kai-Chi Lau,<sup>a,b</sup> Junfang Zhao,<sup>a</sup> Stefanie Mudler,<sup>a</sup> Yating Wang,<sup>a</sup> Irine S. Saminathan,<sup>a</sup> Alan C. Hopkinson,<sup>a</sup> K.W. Michael Siu<sup>a,b</sup> \**

*<sup>a</sup>Department of Chemistry and Centre for Research in Mass Spectrometry, York University, 4700 Keele Street, Toronto, Ontario, Canada M3J 1P3*

*<sup>b</sup>Department of Chemistry and Biochemistry, Windsor University, 401 Sunset Avenue, Windsor Ontario, Canada N9B 3P4*

### **Supporting information**

\*Corresponding author

Email: kwmsiu@uwindsor.ca

Figure S1. Energy-resolved diagram of  $AAAWA^*_{\text{oxa}}^{\bullet+}$  where  $A^*$  denotes the alanine having a  $CD_3$  side chain. The formation of ion at  $m/z$  240 is the dominant dissociation channel and the loss of  $AA_{\text{oxa}}$  ( $m/z$  328) is always more abundant than the loss of only one alanine residue ( $m/z$  399).

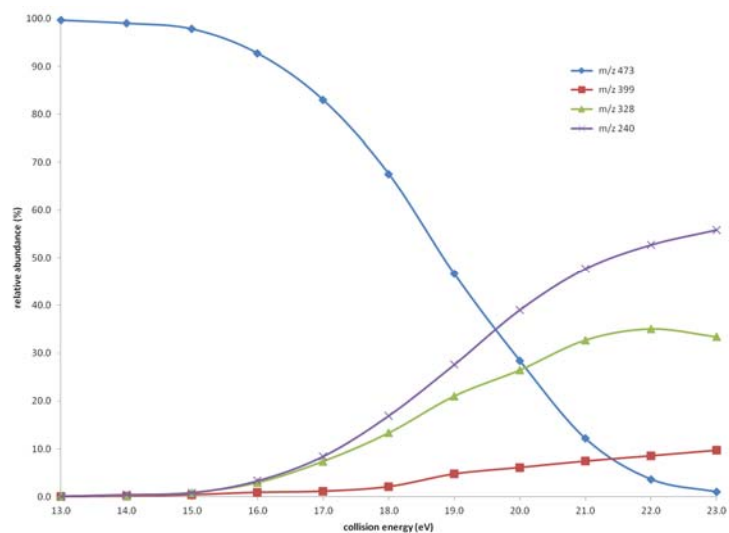

Figure S2. Mechanisms for the dissociation of  $[b_5 - H]^{\bullet+}$  ion induced by the migration of a proton (A) from the nitrogen of the oxazolone ring and (B) from the  $\beta$ -CH<sub>2</sub> group of the tryptophan side chain. Enthalpies ( $\Delta H^0_0$ , kcal mol<sup>-1</sup>) and free energies ( $\Delta G^0_{298}$ , in parenthesis) are calculated at the B3LYP/6-31++G(d,p) level. All energies are relative to the global minimum structure **Ie**.

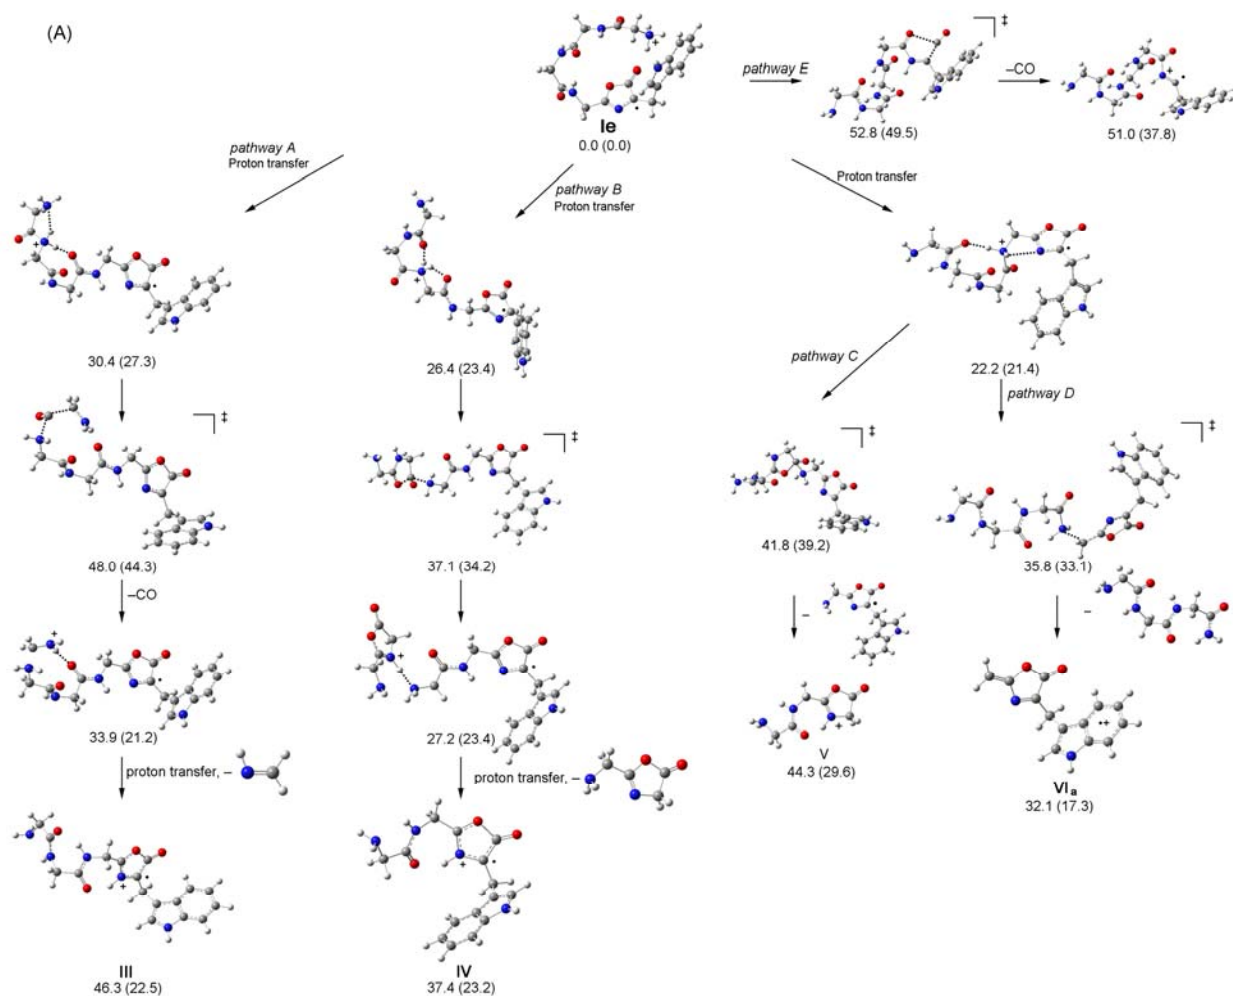

(B)

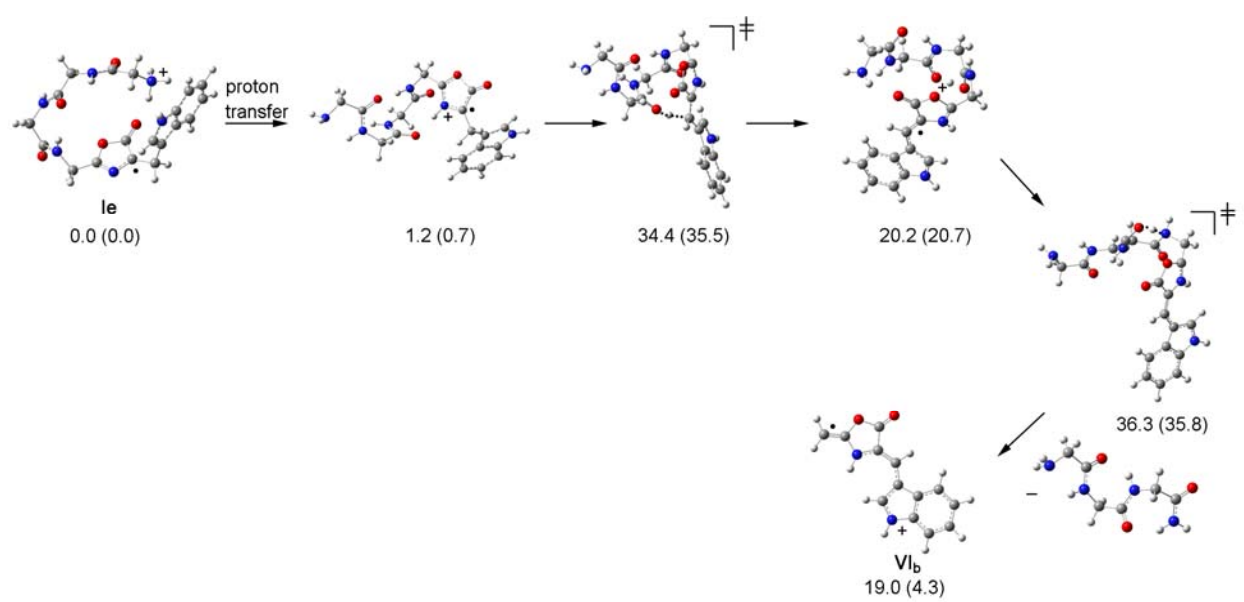

Supplement: c5cp00178a1.pdf [file c5cp00178a1.pdf]
